# Supplementary material for: Ethnolinguistic Communities: The Physical Visibility of MENA Americans and the Local Enregisterment of Dearborn English
Source: MDPI journal article supplement (doi:10.3390/genealogy8020041), 2024-04-11
Supplement: s1 [file s1]

**Supplementary Materials for Manuscript “Ethnolinguistic Communities: The Physical Visibility of MENA Americans and the Local Enregisterment of Dearborn English”**

**Figure S1:** Sample question from Study 1’s survey.

3/9. Please categorize the people you see in these pictures into different ethnic groups. If you think two or more people belong to the same ethnic category, drag and drop the pictures into the same group.

| Items                                                                               | Ethnic Group 1 | Ethnic Group 2 |
|-------------------------------------------------------------------------------------|----------------|----------------|
|    |                |                |
|   |                |                |
|  |                |                |
|  |                |                |
|                                                                                     | Ethnic Group 3 | Ethnic Group 4 |
|                                                                                     |                |                |

**Figure S2:** Sample question from Section 1 of the survey in Study 2.

1/1. Please listen to the recordings below and assign speakers to different groups based on how similar you think different speakers sound like.

First, listen to all of the recordings and keep a note of the speakers who sound similar to each other. You can listen to the recordings as many times as you'd like to.

Then assign each speaker to a group: if two or more speakers sound similar to each other, assign them to the same group; if you think a particular speaker doesn't sound like any other speaker, assign a group to that speaker only.

You may use any number of the provided groups but you might not need to use all the groups.

In these recordings different speakers read the same sentences. Please pay attention only to the accent and not to how fast or slow a given speaker reads the sentences.

|                                                                                             | Group 1               | Group 2               | Group 3               | Group 4               | Group 5               |
|---------------------------------------------------------------------------------------------|-----------------------|-----------------------|-----------------------|-----------------------|-----------------------|
| Speaker 01                                                                                  |                       |                       |                       |                       |                       |
| <div><div><div>▶</div><div>0:00 / 0:08</div><div></div><div>🔊</div><div>⋮</div></div></div> | <input type="radio"/> |
| Speaker 02                                                                                  |                       |                       |                       |                       |                       |
| <div><div><div>▶</div><div>0:00 / 0:08</div><div></div><div>🔊</div><div>⋮</div></div></div> | <input type="radio"/> |
| Speaker 03                                                                                  |                       |                       |                       |                       |                       |
| <div><div><div>▶</div><div>0:00 / 0:08</div><div></div><div>🔊</div><div>⋮</div></div></div> | <input type="radio"/> |
| Speaker 04                                                                                  |                       |                       |                       |                       |                       |
| <div><div><div>▶</div><div>0:00 / 0:07</div><div></div><div>🔊</div><div>⋮</div></div></div> | <input type="radio"/> |
| Speaker 05                                                                                  |                       |                       |                       |                       |                       |
| <div><div><div>▶</div><div>0:00 / 0:08</div><div></div><div>🔊</div><div>⋮</div></div></div> | <input type="radio"/> |

**Figure S3:** Sample question from Section 2 of the survey in Study 2.

1/5. Previously, you said that you have lived in southeastern Michigan. Please listen to the following recording and answer the following questions.

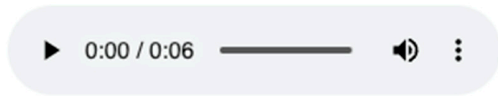

Below you see a map of southeastern Michigan. Where do you think the person whose voice is in the recording is from on the map below? Please click on the area that you think this person is from. Please **select only one area** from the ones listed below.

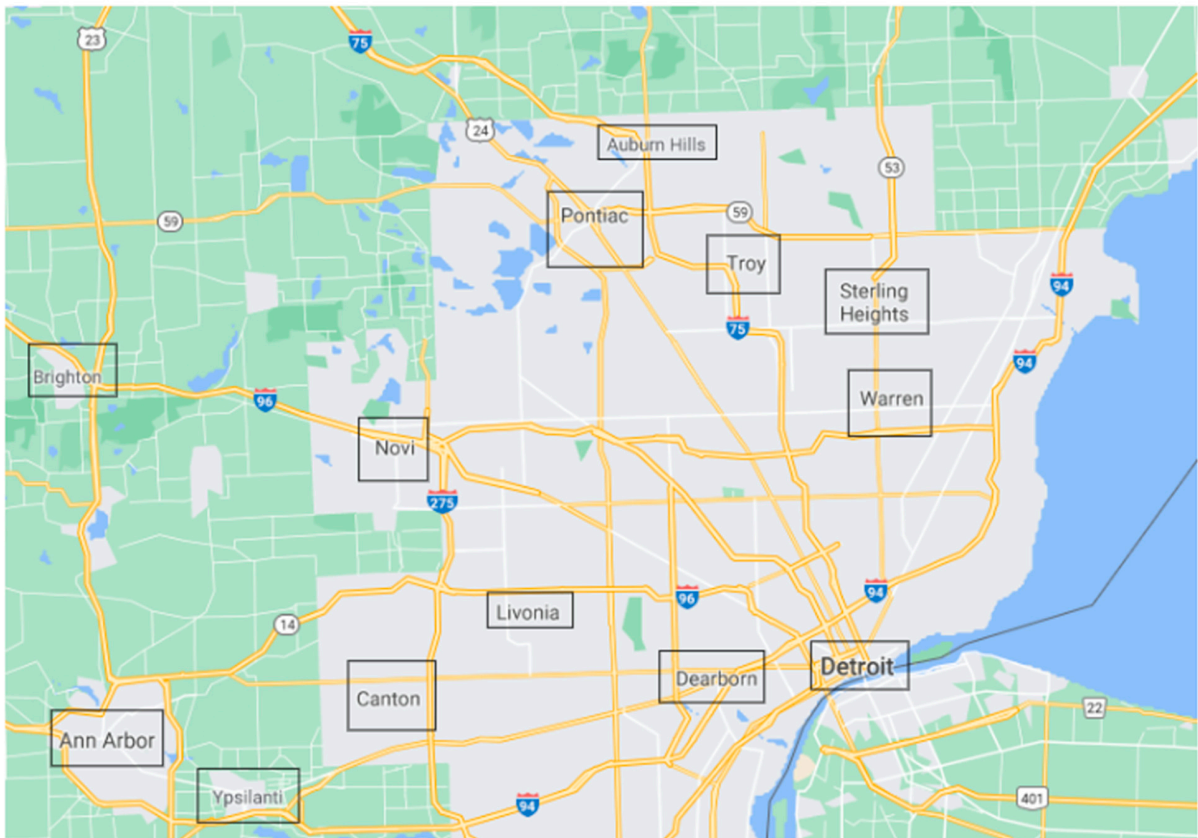

**Table S1:** Logistic regression results for different grouping patterns within Study 1.

| Group types Participants |      | Intercept                                          | Estimate | Standard Error | Z value | <i>p</i> |
|--------------------------|------|----------------------------------------------------|----------|----------------|---------|----------|
| Broad grouping types     | All  | MENA: Grouped by self                              | 0.3      | 0.02           | 11.2    | <0.01    |
|                          |      | Non-white: Grouped by self                         | 1.2      | 0.05           | 21.6    | <0.01    |
|                          |      | White: Grouped by self                             | 0.2      | 0.05           | 4.07    | <0.01    |
|                          | MENA | MENA: Grouped by self                              | 0.11     | 0.08           | 1.3     | 0.19     |
|                          |      | Non-white: Grouped by self                         | 1.3      | 0.18           | 7.2     | <0.01    |
|                          |      | White: Grouped by self                             | 0.47     | 0.15           | 3.05    | <0.01    |
| Two-member groups        | All  | MENA: Grouped with white                           | 0.7      | 0.06           | 12.5    | <0.01    |
|                          |      | MENA: Grouped with non-white                       | 16.81    | 3.82           | 0.04    | 0.96     |
|                          |      | MENA: Grouped with MENA                            | 0.045    | 0.05           | 0.8     | 0.4      |
|                          |      | MENA with traditional attire: grouped with MENA    | 3.12     | 0.18           | 17.4    | <0.01    |
|                          |      | MENA without traditional attire: grouped with MENA | -2.7     | 0.16           | -16.9   | <0.01    |
|                          | MENA | MENA: Grouped with white                           | 0.6      | 0.17           | 3.3     | <0.01    |
|                          |      | MENA: Grouped with non-white                       | 16.9     | 1.31           | 0.01    | 0.98     |
|                          |      | MENA: Grouped with MENA                            | 0.048    | 0.017          | 0.001   | 0.9      |
|                          |      | MENA with traditional attire: grouped with MENA    | 2.37     | 0.46           | 5.1     | <0.01    |
|                          |      | MENA without traditional attire: grouped with MENA | -2.09    | 0.4            | -5.2    | <0.01    |
| Three-member groups      | All  | 1 MENA & 2 non-MENAs                               | -1.5     | 0.14           | -10.2   | <0.01    |
|                          |      | Non-white & 2 MENAs                                | -1.17    | 0.13           | -8.85   | <0.01    |
|                          |      | White & 2 MENAs                                    | 0.3      | 0.1            | 2.9     | <0.01    |
|                          | MENA | 1 MENA & 2 non-MENAs                               | -1.05    | 0.74           | -1.4    | 0.15     |
|                          |      | Non-white & 2 MENAs                                | 1.46     | 0.4            | 3.62    | <0.01    |
|                          |      | White & 2 MENAs                                    | -0.9     | 0.4            | -2.2    | <0.03    |

**Table S2:** Logistic regression results for different grouping patterns within Study 2.

| Group types          | Survey version | Intercept                       | Estimate | Standard Error | Z value | <i>p</i> |
|----------------------|----------------|---------------------------------|----------|----------------|---------|----------|
| Broad grouping types | Female voice   | Black: Grouped by self          | 0.8      | 0.1            | 7.4     | <0.01    |
|                      |                | Dearborn: Grouped by self       | -1.3     | 0.1            | -10.6   | <0.01    |
|                      |                | Foreign: Grouped by self        | 1.2      | 0.18           | 6.5     | <0.01    |
|                      |                | White: Grouped by self          | -1.4     | 0.15           | -9.7    | <0.01    |
|                      | Male voice     | Black: Grouped by self          | 1.3      | 0.1            | 10.8    | <0.01    |
|                      |                | Dearborn: Grouped by self       | -1.9     | 0.14           | -13.5   | <0.01    |
|                      |                | Foreign: Grouped by self        | 0.06     | 0.17           | 0.36    | 0.7      |
|                      |                | White: Grouped by self          | 1.09     | 0.16           | 6.7     | <0.01    |
| Two-member groups    | Female voice   | Dearborn: Grouped with Dearborn | 0.09     | 0.002          | 0.009   | 0.99     |
|                      |                | Dearborn: Grouped with foreign  | 1.36     | 0.7            | 1.8     | 0.07     |
|                      |                | Dearborn: Grouped with white    | 4.6      | 0.78           | 5.9     | <0.01    |
|                      |                | Dearborn: grouped with black    | -0.02    | 0.02           | -0.01   | 0.99     |
|                      | Male voice     | Dearborn: Grouped with Dearborn | 1.6      | 0.38           | 4.15    | <0.01    |
|                      |                | Dearborn: Grouped with foreign  | 2.4      | 0.5            | 4.9     | <0.04    |
|                      |                | Dearborn: Grouped with white    | -0.01    | 0.015          | -0.01   | 0.99     |
|                      |                | Dearborn: grouped with black    | -0.02    | 0.01           | -0.01   | 0.99     |
| Three-member groups  | Female         | White&2Dearborners              | 1.7      | 0.38           | 4.6     | <0.01    |
|                      |                | Foreign&2Dearborners            | -5.3     | 1.03           | -5.1    | <0.01    |
|                      | Male           | White&2Dearborners              | -0.17    | 0.2            | -0.4    | 0.4      |
|                      |                | Foreign&2Dearborners            | 4.5      | 1              | 4.4     | <0.01    |
